# Supplementary material for: Small RNA Profiling in HTLV-1-infected Patient with Acute Adult T-cell Leukemia-Lymphoma at Diagnosis and After Maintenance Therapy: A Case Study
Source: Preprints.org preprint supplement (doi:10.20944/preprints202301.0310.v1), 2023-01-17
Supplement: Supplementary file 1 [file supplementary]

## Sheet: Table S2
Table S2. Novel sRNAs differentially expressed after (J2) and before (J1) maintenance therapy.
Gene ID	FC ([After] vs [Before])	Regulation ([After] vs [Before])	Gene Type
NEWGENE339	-36000004	down	miRNA
NEWGENE1	4813793	up	Unknown
NEWGENE2	14500002	up	Unknown
NEWGENE3	13199998	up	Unknown
NEWGENE8	16699998	up	Unknown
NEWGENE11	15600002	up	Unknown
NEWGENE15	7800001	up	Unknown
NEWGENE26	13799998	up	Unknown
NEWGENE340	16499998	up	tRNA
NEWGENE34	58000008	up	Unknown
NEWGENE46	91000015	up	Unknown
NEWGENE108	29890002	up	Unknown
NEWGENE118	36100006	up	Unknown
NEWGENE145	280.0	up	Unknown
NEWGENE342	-18217945	down	snoRNA
NEWGENE154	49999996	up	Unknown
NEWGENE158	135.0	up	Unknown
NEWGENE167	55666668	up	Unknown
NEWGENE180	7899999	up	Unknown
NEWGENE345	14.25	up	tRNA
NEWGENE198	33689993	up	Unknown
NEWGENE222	54831.99	up	Unknown
NEWGENE346	38000004	up	tRNA
NEWGENE226	10600001	up	Unknown
NEWGENE227	63000008	up	Unknown
NEWGENE228	36425003	up	Unknown
NEWGENE230	14299997	up	Unknown
NEWGENE231	29600003	up	Unknown
NEWGENE6	23499998	up	Unknown
NEWGENE7	71460005	up	Unknown
NEWGENE9	28099997	up	Unknown
NEWGENE10	134.0	up	Unknown
NEWGENE12	19699998	up	Unknown
NEWGENE14	-23.5	down	Unknown
NEWGENE351	26000004	up	tRNA
NEWGENE352	35.0	up	tRNA
NEWGENE21	41555553	up	Unknown
NEWGENE23	8024999	up	Unknown
NEWGENE353	704.0	up	miRNA
NEWGENE36	48200006	up	Unknown
NEWGENE37	7800001	up	Unknown
NEWGENE354	15230767	up	miRNA
NEWGENE44	53000004	up	Unknown
NEWGENE45	10199999	up	Unknown
NEWGENE355	26.4	up	tRNA
NEWGENE50	110.0	up	Unknown
NEWGENE54	4680713	up	Unknown
NEWGENE60	92400024	up	Unknown
NEWGENE70	11499999	up	Unknown
NEWGENE71	70.0	up	Unknown
NEWGENE78	21143347	up	Unknown
NEWGENE81	124000015	up	Unknown
NEWGENE357	1505.0	up	miRNA
NEWGENE112	6899999	up	Unknown
NEWGENE358	3380001	up	tRNA
NEWGENE117	333.0	up	Unknown
NEWGENE148	9534999	up	Unknown
NEWGENE150	114.0	up	Unknown
NEWGENE153	12899998	up	Unknown
NEWGENE359	41.0	up	tRNA
NEWGENE172	56.0	up	Unknown
NEWGENE176	22310005	up	Unknown
NEWGENE178	6950001	up	Unknown
NEWGENE181	20399998	up	Unknown
NEWGENE183	92.0	up	Unknown
NEWGENE361	16453333	up	tRNA
NEWGENE192	27900006	up	Unknown
NEWGENE347	9500001	up	tRNA
NEWGENE30	64.0	up	Unknown
NEWGENE49	2710001	up	Unknown
NEWGENE63	-27599997	down	Unknown
NEWGENE66	57800006	up	Unknown
NEWGENE348	35.0	up	tRNA
NEWGENE79	7540002	up	Unknown
NEWGENE84	8119999	up	Unknown
NEWGENE85	16669998	up	Unknown
NEWGENE92	54000004	up	Unknown
NEWGENE94	63000008	up	Unknown
NEWGENE95	22983608	up	Unknown
NEWGENE102	93.0	up	Unknown
NEWGENE106	19900003	up	Unknown
NEWGENE349	26258066	up	tRNA
NEWGENE122	8283997	up	Unknown
NEWGENE126	39299994	up	Unknown
NEWGENE127	7200001	up	Unknown
NEWGENE133	56.0	up	Unknown
NEWGENE138	23900003	up	Unknown
NEWGENE350	26000004	up	tRNA
NEWGENE229	23999997	up	Unknown
NEWGENE232	78819.97	up	Unknown
NEWGENE233	16750005	up	Unknown
NEWGENE16	128.0	up	Unknown
NEWGENE17	62000008	up	Unknown
NEWGENE24	14699998	up	Unknown
NEWGENE28	77.0	up	Unknown
NEWGENE29	59200006	up	Unknown
NEWGENE33	9000001	up	Unknown
NEWGENE39	5506668	up	Unknown
NEWGENE42	98999985	up	Unknown
NEWGENE51	23300003	up	Unknown
NEWGENE56	41400006	up	Unknown
NEWGENE88	60509076	up	Unknown
NEWGENE107	12156312	up	Unknown
NEWGENE113	57.0	up	Unknown
NEWGENE120	2620001	up	Unknown
NEWGENE121	-2566666	down	Unknown
NEWGENE19	220.0	up	Unknown
NEWGENE20	163.0	up	Unknown
NEWGENE25	11699999	up	Unknown
NEWGENE27	7800001	up	Unknown
NEWGENE32	3955.0	up	Unknown
NEWGENE38	1337.0	up	Unknown
NEWGENE41	19000002	up	Unknown
NEWGENE367	23607141	up	tRNA
NEWGENE52	46774994	up	Unknown
NEWGENE55	19.25	up	Unknown
NEWGENE62	508.0	up	Unknown
NEWGENE65	71545465	up	Unknown
NEWGENE333	3511909.0	up	Unknown
NEWGENE334	146.0	up	Unknown
NEWGENE335	13637003	up	Unknown
NEWGENE337	85.0	up	Unknown
NEWGENE372	61000008	up	tRNA
NEWGENE373	19999998	up	tRNA
NEWGENE338	59000008	up	Unknown
NEWGENE31	52000008	up	Unknown
NEWGENE363	35851852	up	miRNA
NEWGENE40	14788737	up	Unknown
NEWGENE43	63000008	up	Unknown
NEWGENE48	1666666	up	Unknown
NEWGENE57	163.0	up	Unknown
NEWGENE69	50999996	up	Unknown
NEWGENE364	-7615001	down	miRNA
NEWGENE72	91000015	up	Unknown
NEWGENE73	3560001	up	Unknown
NEWGENE74	2451219	up	Unknown
NEWGENE76	104000015	up	Unknown
NEWGENE89	11999999	up	Unknown
NEWGENE93	63000008	up	Unknown
NEWGENE365	7859999	up	tRNA
NEWGENE96	28.0	up	Unknown
NEWGENE105	40599994	up	Unknown
NEWGENE115	59000008	up	Unknown
NEWGENE116	14399997	up	Unknown
NEWGENE123	50599985	up	Unknown
NEWGENE366	37000004	up	tRNA
NEWGENE136	18150004	up	Unknown
NEWGENE139	29750002	up	Unknown
NEWGENE141	8220001	up	Unknown
NEWGENE47	54899994	up	Unknown
NEWGENE59	61000008	up	Unknown
NEWGENE67	58000008	up	Unknown
NEWGENE68	38799994	up	Unknown
NEWGENE376	435.0	up	tRNA
NEWGENE77	21215199	up	Unknown
NEWGENE87	32250006	up	Unknown
NEWGENE90	214.0	up	Unknown
NEWGENE91	475.0	up	Unknown
NEWGENE377	159.0	up	tRNA
NEWGENE124	46000012	up	Unknown
NEWGENE151	30323215	up	Unknown
NEWGENE197	9653329	up	Unknown
NEWGENE211	57.0	up	Unknown
NEWGENE374	82.0	up	tRNA
NEWGENE53	7999999	up	Unknown
NEWGENE61	112.0	up	Unknown
NEWGENE64	5010001	up	Unknown
NEWGENE75	14199998	up	Unknown
NEWGENE375	20200003	up	tRNA
NEWGENE318	-228.0	down	Unknown
NEWGENE319	31200003	up	Unknown
NEWGENE320	64.0	up	Unknown
NEWGENE322	14633334	up	Unknown
NEWGENE323	94.0	up	Unknown
NEWGENE324	10899999	up	Unknown
NEWGENE325	30500004	up	Unknown
NEWGENE326	164.0	up	Unknown
NEWGENE327	47000012	up	Unknown
NEWGENE328	7899999	up	Unknown
NEWGENE329	10703335	up	Unknown
NEWGENE330	13589004	up	Unknown
NEWGENE331	3249999	up	Unknown
NEWGENE332	26773994	up	Unknown
NEWGENE86	64.0	up	Unknown
NEWGENE97	40199994	up	Unknown
NEWGENE101	512.0	up	Unknown
NEWGENE104	68.0	up	Unknown
NEWGENE129	63000008	up	Unknown
NEWGENE132	5593.0	up	Unknown
NEWGENE137	15919996	up	Unknown
NEWGENE392	39999996	up	tRNA
NEWGENE149	458.0	up	Unknown
NEWGENE160	50999996	up	Unknown
NEWGENE393	2754335	up	tRNA
NEWGENE185	91000015	up	Unknown
NEWGENE186	67.0	up	Unknown
NEWGENE394	21589993	up	miRNA
NEWGENE201	113.0	up	Unknown
NEWGENE98	57.0	up	Unknown
NEWGENE99	6899999	up	Unknown
NEWGENE100	67.0	up	Unknown
NEWGENE103	67899994	up	Unknown
NEWGENE109	44299988	up	Unknown
NEWGENE379	10536665	up	miRNA
NEWGENE110	10800001	up	Unknown
NEWGENE111	11079998	up	Unknown
NEWGENE130	6500001	up	Unknown
NEWGENE155	42500012	up	Unknown
NEWGENE165	48800006	up	Unknown
NEWGENE179	20200003	up	Unknown
NEWGENE188	42900003	up	Unknown
NEWGENE193	85999994	up	Unknown
NEWGENE196	602.0	up	Unknown
NEWGENE119	63000008	up	Unknown
NEWGENE380	32710002	up	tRNA
NEWGENE125	8700001	up	Unknown
NEWGENE128	8300001	up	Unknown
NEWGENE131	13250001	up	Unknown
NEWGENE134	101000015	up	Unknown
NEWGENE135	14699998	up	Unknown
NEWGENE143	26400006	up	Unknown
NEWGENE386	34666676	up	tRNA
NEWGENE184	49999996	up	Unknown
NEWGENE387	31909096	up	snoRNA
NEWGENE200	9599999	up	Unknown
NEWGENE204	92.0	up	Unknown
NEWGENE388	43.0	up	tRNA
NEWGENE206	17299997	up	Unknown
NEWGENE207	12683163	up	Unknown
NEWGENE208	9500001	up	Unknown
NEWGENE140	26400006	up	Unknown
NEWGENE144	19859993	up	Unknown
NEWGENE146	16600002	up	Unknown
NEWGENE147	62000008	up	Unknown
NEWGENE156	126000015	up	Unknown
NEWGENE161	7999999	up	Unknown
NEWGENE164	7200001	up	Unknown
NEWGENE166	721.0	up	Unknown
NEWGENE168	-14428574	down	Unknown
NEWGENE170	28999994	up	Unknown
NEWGENE177	82.0	up	Unknown
NEWGENE397	35.0	up	tRNA
NEWGENE214	164.0	up	Unknown
NEWGENE215	-114.0	down	Unknown
NEWGENE219	11100001	up	Unknown
NEWGENE398	32999996	up	tRNA
NEWGENE399	27773002	up	miRNA
NEWGENE223	62000008	up	Unknown
NEWGENE400	159.0	up	tRNA
NEWGENE401	57433344	up	tRNA
NEWGENE224	56.0	up	Unknown
NEWGENE225	73700024	up	Unknown
NEWGENE175	17665996	up	Unknown
NEWGENE190	19772726	up	Unknown
NEWGENE396	60117626	up	miRNA
NEWGENE220	6899999	up	Unknown
NEWGENE234	1302.0	up	Unknown
NEWGENE236	51.5	up	Unknown
NEWGENE243	19999998	up	Unknown
NEWGENE265	70.0	up	Unknown
NEWGENE267	77.0	up	Unknown
NEWGENE169	1532.0	up	Unknown
NEWGENE173	-26320011	down	Unknown
NEWGENE395	42700006	up	tRNA
NEWGENE187	35166672	up	Unknown
NEWGENE189	44749996	up	Unknown
NEWGENE191	-39499996	down	Unknown
NEWGENE194	6599999	up	Unknown
NEWGENE209	24800003	up	Unknown
NEWGENE210	113.0	up	Unknown
NEWGENE216	27142856	up	Unknown
NEWGENE199	6599999	up	Unknown
NEWGENE202	20200003	up	Unknown
NEWGENE212	170.0	up	Unknown
NEWGENE213	20099997	up	Unknown
NEWGENE402	27499997	up	tRNA
NEWGENE217	55.0	up	Unknown
NEWGENE403	38025003	up	tRNA
NEWGENE404	8549999	up	miRNA
NEWGENE235	-15189476	down	Unknown
NEWGENE237	176.0	up	Unknown
NEWGENE405	24066673	up	tRNA
NEWGENE238	98999985	up	Unknown
NEWGENE239	98999985	up	Unknown
NEWGENE240	6500001	up	Unknown
NEWGENE241	12249999	up	Unknown
NEWGENE242	113.0	up	Unknown
NEWGENE245	-11685712	down	Unknown
NEWGENE246	101000015	up	Unknown
NEWGENE247	41100006	up	Unknown
NEWGENE248	17400002	up	Unknown
NEWGENE251	11900001	up	Unknown
NEWGENE253	40400006	up	Unknown
NEWGENE254	6899999	up	Unknown
NEWGENE255	59000008	up	Unknown
NEWGENE411	3829.0	up	miRNA
NEWGENE412	2036.0	up	miRNA
NEWGENE314	49.0	up	Unknown
NEWGENE315	1203125	up	Unknown
NEWGENE414	44.0	up	tRNA
NEWGENE316	5607501	up	Unknown
NEWGENE317	7500001	up	Unknown
NEWGENE409	22.0	up	tRNA
NEWGENE249	57.0	up	Unknown
NEWGENE252	37571426	up	Unknown
NEWGENE256	2710001	up	Unknown
NEWGENE257	23900003	up	Unknown
NEWGENE258	16499998	up	Unknown
NEWGENE259	23600003	up	Unknown
NEWGENE260	540.0	up	Unknown
NEWGENE410	9349997	up	tRNA
NEWGENE263	110.0	up	Unknown
NEWGENE264	18666662	up	Unknown
NEWGENE270	57.0	up	Unknown
NEWGENE271	65970.04	up	Unknown
NEWGENE418	31500004	up	snoRNA
NEWGENE419	37210007	up	miRNA
NEWGENE279	10100002	up	Unknown
NEWGENE280	35300012	up	Unknown
NEWGENE283	54809995	up	Unknown
NEWGENE420	56249985	up	tRNA
NEWGENE288	49999996	up	Unknown
NEWGENE422	14166672	up	tRNA
NEWGENE295	22500002	up	Unknown
NEWGENE296	6600001	up	Unknown
NEWGENE297	12180001	up	Unknown
NEWGENE299	9999999	up	Unknown
NEWGENE262	-55.0	down	Unknown
NEWGENE424	11191053	up	tRNA
NEWGENE276	38699994	up	Unknown
NEWGENE281	94.0	up	Unknown
NEWGENE282	20200003	up	Unknown
NEWGENE284	17099998	up	Unknown
NEWGENE285	159.0	up	Unknown
NEWGENE425	56.5	up	tRNA
NEWGENE286	11499999	up	Unknown
NEWGENE426	15555557	up	miRNA
NEWGENE287	188.0	up	Unknown
NEWGENE289	12299999	up	Unknown
NEWGENE290	7400001	up	Unknown
NEWGENE266	19000002	up	Unknown
NEWGENE417	28333336	up	tRNA
NEWGENE273	-70.0	down	Unknown
NEWGENE274	22875	up	Unknown
NEWGENE423	36000004	up	tRNA
NEWGENE275	14500002	up	Unknown
NEWGENE277	58000008	up	Unknown
NEWGENE278	29250006	up	Unknown
NEWGENE291	10600001	up	Unknown
NEWGENE293	18700002	up	Unknown
NEWGENE294	10800001	up	Unknown
NEWGENE292	22428568	up	Unknown
NEWGENE300	61000008	up	Unknown
NEWGENE304	4129999	up	Unknown
NEWGENE305	8679998	up	Unknown
NEWGENE306	48299997	up	Unknown
NEWGENE307	59999992	up	Unknown
NEWGENE309	13199998	up	Unknown
NEWGENE310	103.0	up	Unknown
NEWGENE427	18724994	up	tRNA
NEWGENE312	10989999	up	Unknown
NEWGENE313	5033334	up	Unknown
NEWGENE301	12299999	up	Unknown
